# Supplementary material
Source: Springer Nature journal article supplement (https://www.springermedizin.de/resource/supplementary/12943_2010_814_MOESM10_ESM.pdf/9554896)

**A**

## IL-6 ELISA assay

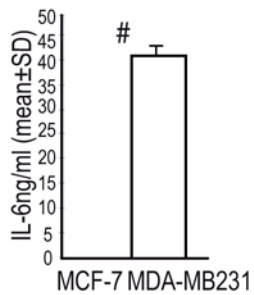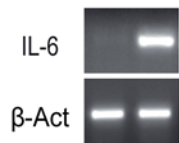**B**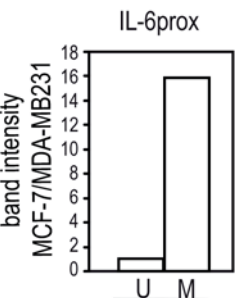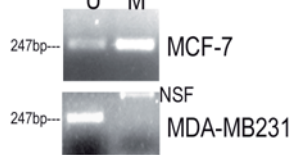**C**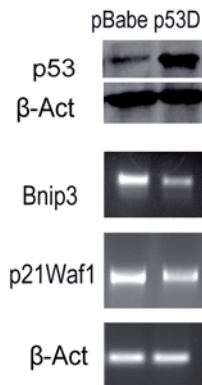

## p53-Luc

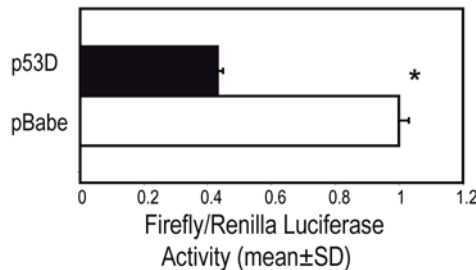**D**

## IL-6 ELISA assay

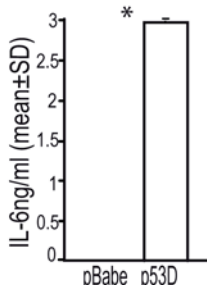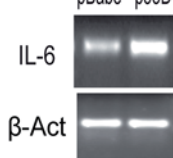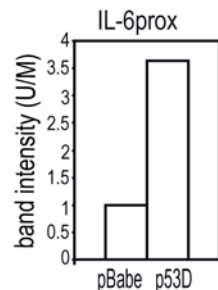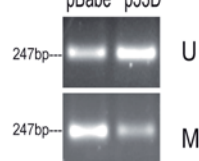

Supplement: MOESM10 [file 9554896]
